# Supplementary material
Source: Research Square preprint supplement (doi:10.21203/rs.3.rs-9518302/v1)
Supplement: Supplementary file 1 [file 7993d414c20530e73b6bd619.docx]

# Lampiran

1. Kuesioner Penelitian

**PENGANTAR**

Assalamu’alaikum wr. wb.

Sdra/i responden yang berbahagia,

Sehubungan dengan kegiatan penelitian ini, kami mohon kesediaannya agar berkenan meluangkan waktu untuk mengisi daftar kuesioner penelitian mengenai *“*Peran *University Religiosity* dan *University Reputation dalam* Memediasi Hubungan *University Service Quality, University Heritage,* dan *University Brand Identity* terhadap *Student Satisfaction”.* Informasi yang di berikan merupakan bantuan yang sangat berarti bagi kami dalam menyelesaikan penelitian ini. Penelitian ini dilakukan untuk kepentingan akademis semata yang merupakan salah satu tugas Penelitian dalam penulisan Disertasi dan Tridharma Perguruan Tinggi. Adapun jawaban yang telah di berikan akan kami jaga kerahasiaannya dan hanya digunakan untuk kepentingan penelitian ini.

Demikian, atas bantuan dan kesediaannya dalam meluangkan waktu kami ucapkan terimakasih.

Wassalamu’alaikum Wr. Wb.

*Jika ada pertanyaan terkait kuisioner ini, Bapak/Ibu/Sdr (i) dapat menanyakan langsung ke* ***0813-2861-9993 (*arif*)*** *atau mengirim email ke* [ariffakhrudin21@gmail.com](mailto:ariffakhrudin21@gmail.com), *peneliti menjamin kerahasiaan identitasnya.*

Hormat kami

Tim

Arif Fakhrudin, Nuryakin, Mohammad Suyanto.

**LEMBAR PERSETUJUAN RESPONDEN**

**(INFORMED CONSENT)**

Apakah anda bersedia menjadi responden pada penelitian yang dilakukan oleh:

Nama : Arif Fakhrudin

Program Studi : Doktor Manajemen

Institusi : Universitas Muhammadiyah Yogyakarta

Topik Penelitian : Peran *University Religiosity* dan *University Reputation* dalamMemediasi Hubungan *University Service Quality, University Heritage,* dan *University Brand Identity* terhadap *Student Satisfaction*

Dengan ketentuan, hasil pemeriksaan akan dirahasiakan dan hanya semata-mata untuk kepentingan ilmu pengetahuan.

| 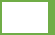 | Yes |
| --- | --- |
| 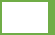 | No |

***SCREENING QUESTION:***

Apakah anda saat ini terdaftar sebagai mahasiswa di Perguruan Tinggi Islam di Yogyakarta atau di Jawa Tengah?

⬜ Ya

⬜ Tidak

Apakah anda saat ini berstatus sebagai mahasiswa aktif di Perguruan Tinggi Islam di Yogyakarta atau di Jawa Tengah?

⬜ Ya

⬜ Tidak

Perguruan Tinggi asal anda/saat ini:

⬜ UMY ⬜ UMS

⬜ UNISA ⬜ UNIMA

⬜ UAD ⬜ UNISULA

⬜ UII ⬜ UMP

Jenjang pendidikan apa yang sedang anda tempuh saat ini?

⬜ Diploma (D3)

⬜ Sarjana (S1)

⬜ Magister (S2)

⬜ Doktor (S3)

Berapa lama Anda telah menempuh pendidikan di perguruan tinggi ini?

⬜ Kurang dari 1 semester

⬜ 1 – 2 semester

⬜ 3 – 4 semester

⬜ Lebih dari 4 semester

Apakah anda pernah menggunakan layanan atau fasilitas akademik dan non akademik dari kampus ini?

⬜ Ya

⬜ Tidak

Apakah anda pernah merekomendasikan kampus tempat anda kuliah kepada orang lain?

⬜ Ya

⬜ Tidak

**DATA DIRI RESPONDEN**

Petunjuk: Isi sesuai dengan jawaban anda dan berilah tanda silang (X) pada pilihan jawaban.

1. Jenis Kelamin:

⬜ Laki-laki

⬜ Perempuan

2. Usia Anda (tahun):

⬜ Di bawah 18 tahun

⬜ 18 – 20 tahun

⬜ 21 – 23 tahun

⬜ 24 – 26 tahun

⬜ Di atas 26 tahun

3. Provinsi domisili saat ini:

⬜ Daerah Istimewa Yogyakarta

⬜ Jawa Tengah

4. Status tempat tinggal selama kuliah:

⬜ Tinggal di rumah orang tua

⬜ Tinggal di kos/kontrakan/asrama

⬜ Tinggal sendiri di rumah pribadi

⬜ Lainnya: _______________

6. Apakah Anda aktif dalam kegiatan organisasi kampus?

⬜ Ya

⬜ Tidak

7. Sumber pembiayaan kuliah Anda:

⬜ Biaya pribadi/orang tua

⬜ Beasiswa (misal: Bidikmisi/KIP/PPA/beasiswa kampus)

⬜ Sumber lain: _______________

**PETUNJUK PENGISIAN KUESIONER**

Berikut ini terdapat sejumlah pernyataan, silahkan dibaca dan dipahami, serta isilah dengan baik setiap pernyataan tersebut dengan cara memberi tanda centang (√) di dalam kotak pada salah satu pilihan jawaban yang tersedia, yaitu:

1 = Sangat tidak setuju (STS)

2 = Tidak setuju (TS)

3 = Kurang Setuju (KS)

4 = Setuju (S)

5= Sangat Setuju (SS)

**DAFTAR PERNYATAAN**

***University service quality (USQ)***

Adalah: Kualitas pelayanan dapat dipahami sebagai suatu bentuk penilaian atas tingkat keunggulan layanan secara keseluruhan (Panda et al., 2019). Dalam konteks pendidikan tinggi, kualitas layanan mencerminkan harapan sekaligus persepsi mahasiswa terhadap berbagai bentuk layanan yang disediakan oleh universitas. Aspek ini menjadi krusial karena berkontribusi langsung terhadap pembentukan reputasi institusi yang pada gilirannya meningkatkan daya tarik universitas di mata calon mahasiswa maupun pemangku kepentingan lainnya (Daniel et al., 2017).

Dalam penelitian ini, variabel *University Service Quality* dioperasionalisasikan ke dalam lima dimensi utama, yaitu ***tangible*** (fasilitas fisik kampus), ***reliability*** (ketepatan layanan), ***responsiveness*** (ketanggapan terhadap keluhan), ***assurance*** (kepercayaan), dan ***empathy*** (kepedulian) (Panda et al., 2019).

|  | **Pernyataan** | **Pilihan Jawaban** | | | | |
| --- | --- | --- | --- | --- | --- | --- |
| **1** | **2** | **3** | **4** | **5** |
|  | ***University service quality*** | **STS** | **TS** | **KS** | **S** | **SS** |
|  | Fasilitas kampus tersedia dalam kondisi modern serta terpelihara dengan baik. |  |  |  |  |  |
|  | Ruang kelas dan laboratorium dilengkapi dengan teknologi yang menunjang proses pembelajaran. |  |  |  |  |  |
|  | Lingkungan kampus senantiasa terjaga kebersihan dan kenyamanannya. |  |  |  |  |  |
|  | Layanan administrasi diselenggarakan secara tepat waktu. |  |  |  |  |  |
|  | Jadwal perkuliahan dan ujian dilaksanakan sesuai dengan rencana yang telah ditetapkan. |  |  |  |  |  |
|  | Layanan administrasi jarang mengalami kesalahan dalam pelaksanaannya. |  |  |  |  |  |
|  | Dosen dan tenaga kependidikan merespons kebutuhan mahasiswa dengan cepat. |  |  |  |  |  |
|  | Staf kampus tanggap dalam menindaklanjuti keluhan mahasiswa. |  |  |  |  |  |
|  | Dosen bersedia menyediakan waktu tambahan untuk menjawab pertanyaan mahasiswa. |  |  |  |  |  |
|  | Dosen dan staf kampus menunjukkan sikap yang dapat dipercaya. |  |  |  |  |  |
|  | Mahasiswa merasa aman dalam berinteraksi dengan dosen maupun staf kampus. |  |  |  |  |  |
|  | Staf administrasi menyampaikan informasi secara jelas dan akurat. |  |  |  |  |  |
|  | Dosen dan staf memahami kebutuhan akademik mahasiswa. |  |  |  |  |  |
|  | Dosen memberikan perhatian terhadap perkembangan akademik mahasiswa secara individual. |  |  |  |  |  |
|  | Staf kampus senantiasa bersikap ramah serta membantu mahasiswa. |  |  |  |  |  |
|  | (Panda et al., 2019) |  |  |  |  |  |

***University heritage (UH)***

Adalah: Persepsi terhadap sejarah dan tradisi universitas,yang tercermin melalui rekam jejak institusi, usia yang panjang, nilai-nilai fundamental, serta keyakinan organisasi bahwa sejarah memiliki makna strategis (Urde et al., 2007). Seiring waktu, akumulasi pengalaman yang melekat pada sebuah merek akan membentuk persepsi konsumen terhadap merek tersebut (Aaker, 2009). Dalam penelitian ini, variabel *University Heritage* dikonstruksi ke dalam tiga dimensi utama, yaitu **nilai historis**, **tradisi**, dan **warisan**, yang mencakup aspek sejarah universitas, tradisi kelembagaan, serta warisan institusional (Panda et al., 2019).

|  | **Pernyataan** | **Pilihan Jawaban** | | | | |
| --- | --- | --- | --- | --- | --- | --- |
| **1** | **2** | **3** | **4** | **5** |
|  | ***University heritage*** | **STS** | **TS** | **KS** | **S** | **SS** |
| 1. | Universitas ini telah berdiri sejak lama dan memiliki rekam jejak sejarah yang panjang. |  |  |  |  |  |
| 2. | Universitas ini memiliki tradisi yang bernilai dan patut dihargai. |  |  |  |  |  |
| 3. | Universitas ini memiliki warisan yang layak dibanggakan. |  |  |  |  |  |
| 4. | Universitas ini secara konsisten menjaga serta melestarikan tradisi yang dimilikinya. |  |  |  |  |  |
|  | (Panda et al., 2019) |  |  |  |  |  |

***University Brand Identity (UBI)***

Adalah: Waeraas & Solbakk, (2009) mendefinisikan *university brand identity* sebagai esensi khas yang melekat pada sebuah universitas, tercermin melalui nilai-nilai dan praktik organisasi yang membedakannya dari institusi lain. Identitas ini mencerminkan jati diri universitas sekaligus citra yang ingin dibangun dan dipersepsikan oleh pemangku kepentingan internal maupun eksternal. Sejalan dengan itu, Melewar & Jenkins, (2002) menekankan bahwa identitas institusi tidak hanya terbatas pada aspek visual, tetapi juga mencakup dimensi komunikasi, perilaku, serta nilai-nilai inti yang membentuk karakter universitas. Dalam penelitian ini, variabel *University Brand Identity* dikonstruksi melalui dua dimensi utama, yaitu ***visual identity*** (logo, warna, dan elemen grafis) serta ***verbal identity*** (nama institusi, slogan, dan *tagline* yang merepresentasikan nilai dan citra institusi) (Goi et al., 2014).

|  | **Pernyataan** | **Pilihan Jawaban** | | | | |
| --- | --- | --- | --- | --- | --- | --- |
| **1** | **2** | **3** | **4** | **5** |
|  | ***University Brand Identity*** | **STS** | **TS** | **KS** | **S** | **SS** |
| 1. | Logo universitas ini memiliki tampilan yang konsisten serta mudah dikenali. |  |  |  |  |  |
| 2. | Warna dan desain lingkungan kampus mencerminkan karakteristik institusi. |  |  |  |  |  |
| 3. | Slogan universitas merepresentasikan nilai serta tujuan institusi. |  |  |  |  |  |
| 4. | Logo universitas menggambarkan nilai yang membedakannya dari institusi lain. |  |  |  |  |  |
| 5. | Desain visual kampus berkontribusi dalam memperkuat identitas universitas. |  |  |  |  |  |
| 6. | Slogan universitas mudah diingat baik oleh mahasiswa maupun masyarakat umum. |  |  |  |  |  |
|  | (Goi et al., 2014) |  |  |  |  |  |

***University Reputation* (UR)**

Adalah: Reputasi universitas dapat dipahami sebagai bentuk pengakuan maupun penilaian subjektif sekaligus kolektif dari para pemangku kepentingan terhadap institusi, yang tercermin melalui pandangan, sikap, tingkat kepercayaan, kekaguman, penghargaan, serta apresiasi positif yang terbentuk secara berkelanjutan sebagai hasil dari kinerja universitas. Rekam jejak dan tindakan masa lalu universitas berkontribusi signifikan terhadap pencapaian keunggulan kompetitif yang berkesinambungan (Lupiyoadi, 2014). Dalam penelitian ini, variabel *University Reputation* direpresentasikan melalui dua dimensi utama, yakni **citra akademik dan citra eksternal**, yang mencakup keunggulan akademik, reputasi di mata publik, serta prestasi alumni (Panda et al., 2019).

|  | **Pernyataan** | **Pilihan Jawaban** | | | | |
| --- | --- | --- | --- | --- | --- | --- |
| **1** | **2** | **3** | **4** | **5** |
|  | ***University Reputation*** | **STS** | **TS** | **KS** | **S** | **SS** |
|  | Universitas ini dikenal memiliki keunggulan dalam bidang akademik |  |  |  |  |  |
|  | Universitas ini memiliki citra yang positif di kalangan masyarakat. |  |  |  |  |  |
|  | Alumni universitas ini menunjukkan keberhasilan dalam karier profesional mereka. |  |  |  |  |  |
|  | Universitas ini diakui memiliki tenaga pengajar dengan kualitas yang tinggi. |  |  |  |  |  |
|  | Universitas ini memiliki reputasi yang baik, baik di tingkat nasional maupun internasional. |  |  |  |  |  |
|  | Universitas ini secara konsisten memperoleh pemberitaan positif di media massa. |  |  |  |  |  |
|  | (Panda et al., 2019) |  |  |  |  |  |

***Religiosity* (RG)**

Adalah: Religiusitas dalam konteks pendidikan tinggi, atau *university religiosity*, dipahami sebagai tingkat sejauh mana nilai-nilai keagamaan diinternalisasikan, difasilitasi, dan dipelihara dalam lingkungan akademik, baik melalui kebijakan institusional, kurikulum, maupun aktivitas sehari-hari sivitas akademika. Suzanawaty et al., (2021) menegaskan bahwa religiusitas mahasiswa tidak hanya dibentuk oleh keyakinan personal, melainkan juga dipengaruhi oleh dukungan institusi, seperti penyediaan fasilitas ibadah, kegiatan spiritual, serta budaya kampus yang mendukung praktik keagamaan. Dalam penelitian ini, variabel *University Religiosity* dioperasionalisasikan ke dalam tiga dimensi utama, yaitu: (1) **praktik keagamaan harian**, yang mencakup frekuensi pelaksanaan ibadah formal maupun informal; (2) **sikap, keyakinan, dan spiritualitas**, yang berkaitan dengan peran agama dalam pengambilan keputusan akademik maupun kehidupan sehari-hari; serta (3) **atmosfer dan dukungan institusional**, yang mencakup ketersediaan fasilitas ibadah, program-program keagamaan, serta rasa aman dalam mengekspresikan keyakinan di lingkungan kampus (Rockenbach & Mayhew, 2013).

|  | **Pernyataan** | **Pilihan Jawaban** | | | | |
| --- | --- | --- | --- | --- | --- | --- |
| **1** | **2** | **3** | **4** | **5** |
|  | ***Religiosity*** | **STS** | **TS** | **KS** | **S** | **SS** |
|  | Kampus menyediakan sarana ibadah yang memadai bagi sivitas akademika. |  |  |  |  |  |
|  | Saya secara rutin melaksanakan shalat berjamaah di lingkungan kampus. |  |  |  |  |  |
|  | Kampus secara konsisten menyelenggarakan kegiatan keagamaan. |  |  |  |  |  |
|  | Saya merasa aman dan nyaman dalam mengekspresikan keyakinan agama di kampus. |  |  |  |  |  |
|  | Kampus memfasilitasi bimbingan keagamaan bagi mahasiswa. |  |  |  |  |  |
|  | Saya berpartisipasi dalam kegiatan pengajian atau kajian keagamaan yang diselenggarakan kampus. |  |  |  |  |  |
|  | Nilai-nilai keislaman terintegrasi dalam proses pembelajaran. |  |  |  |  |  |
|  | Kampus mendorong mahasiswa untuk berperilaku sesuai dengan ajaran agama. |  |  |  |  |  |
|  | (Rockenbach & Mayhew, 2013) |  |  |  |  |  |

***Student Loyalty* (SL)**

Adalah: Loyalitas pelanggan adalah suatu tindakan atau strategi yang dapat memenangkan persaingan untuk jangka panjang, cara untuk mendapatkan, mempertahankan, dan meningkatkan jumlah pelanggan (Peppers & Rogers, 2005) ; (Zeithaml et al., 2009). Pelanggan setia tercermin dari perilakunya dalam melakukan pembelian berulang kali dalam jangka waktu tertentu, dan pelanggan tersebut mempunyai hubungan emosional yang kuat (komitmen) terhadap produk atau perusahaan Dharmmesta, (1999); Griffin, (2005) dan Barnes, (2001).

|  | **Pernyataan** | **Pilihan Jawaban** | | | | |
| --- | --- | --- | --- | --- | --- | --- |
| **1** | **2** | **3** | **4** | **5** |
|  | ***Student Loyalty*** | **STS** | **TS** | **KS** | **S** | **SS** |
|  | Universitas ini memberi kesan positif pada saya |  |  |  |  |  |
|  | Saya akan merekomendasikan universitas, khususnya prodi saya kepada teman dan anggota keluarga |  |  |  |  |  |
|  | Saya merasa bangga bisa dikaitkan dengan kegiatan universitas |  |  |  |  |  |
|  | Saya tidak mempunyai niat untuk pindah ke universitas lain |  |  |  |  |  |
| 5. | Saya akan berpartisipasi aktif dalam kegiatan mahasiswa di tingkat fakultas/program studi dan universitas. |  |  |  |  |  |
|  | (Martha & Priyono, 2018) |  |  |  |  |  |

**Daftar Pustaka**

Aaker, D. A. (2009). *Managing brand equity: Capitalizing on the value of a brand name*. simon and schuster.

Alam, J. (2016). *A quantitative analysis of student satisfaction and loyalty in the Norwegian School of Hotel Management (NHS), University of Stavanger, Norway*. GRIN Verlag.

Alves, H., & Raposo, M. (2007). The Influence of University Image in Student’s Expectations. *Satisfaction and Loyalty*.

Daniel, D., Liben, G., & Adugna, A. (2017). Assessment of Students’ Satisfaction: A Case Study of Dire Dawa University, Ethiopia. *Journal of Education and Practice*, *8*(4), 111–120.

Goi, M. T., Goi, C. L., & Wong, D. (2014). Constructing a brand identity scale for higher education institutions. *Journal of Marketing for Higher Education*, *24*(1), 59–74.

Lupiyoadi, R. (2014). *Manajemen pemasaran jasa berbasis kompetensi*.

Melewar, T. C., & Jenkins, E. (2002). Defining the corporate identity construct. *Corporate Reputation Review*, *5*(1), 76–90.

Panda, S., Pandey, S. C., Bennett, A., & Tian, X. (2019). University brand image as competitive advantage: a two-country study. *International Journal of Educational Management*, *33*(2), 234–251.

Rockenbach, A. B., & Mayhew, M. J. (2013). How the collegiate religious and spiritual climate shapes students’ ecumenical orientation. *Research in Higher Education*, *54*(4), 461–479.

Suzanawaty, L., Aisyah, M., & Umiyati, U. (2021). A Comparison of Muslim Millennial Students’ Religiousity at Islamic and Non-Faith Based Universities. *TARBIYA: Journal of Education in Muslim Society*, *8*(1), 44–56.

Urde, M., Greyser, S. A., & Balmer, J. M. T. (2007). Corporate brands with a heritage. *Journal of Brand Management*, *15*, 4–19.

Waeraas, A., & Solbakk, M. N. (2009). Defining the essence of a university: Lessons from higher education branding. *Higher Education*, *57*(4), 449–462.
