# Supplementary material
Source: Research Square preprint supplement (doi:10.21203/rs.3.rs-9518302/v1)
Supplement: Supplementary file 2 [file fe913c88a5aeee07bee75b0b.xlsx]

## Sheet: DATA
RES	University Service Quality															University Heritage				University Identity						University Reputation						Religiosity								Student Loyalty
	USQ1	USQ2	USQ3	USQ4	USQ5	USQ6	USQ7	USQ8	USQ9	USQ10	USQ11	USQ12	USQ13	USQ14	USQ15	UH1	UH2	UH3	UH4	UT1	UI2	UI3	UI4	UI5	UI6	UR1	UR2	UR3	UR4	UR5	UR6	RG1	RG2	RG3	RG4	RG5	RG6	RG7	RG8	SL1	SL2	SL3	SL4	SL5
1	4	3	3	3	4	4	4	4	3	4	4	4	4	3	3	4	4	3	4	5	4	4	4	4	4	4	4	4	4	5	4	3	3	4	4	4	3	3	4	4	4	5	4	4
2	3	4	3	3	3	3	3	3	3	3	4	3	3	3	3	4	4	3	4	2	3	3	2	3	3	3	3	2	2	2	3	3	2	3	2	2	3	3	3	3	3	3	4	3
3	3	3	4	4	4	3	4	4	4	4	3	4	4	4	3	4	4	4	3	2	3	2	3	2	3	3	2	3	2	2	2	2	3	2	2	3	2	2	2	4	3	3	4	3
4	4	4	3	4	4	3	3	3	3	3	4	4	3	4	3	3	4	4	4	3	2	3	2	3	3	4	3	3	3	4	4	3	2	3	3	2	3	3	3	3	3	3	3	3
5	4	4	3	3	3	4	4	3	3	4	3	3	4	4	4	2	3	3	3	3	2	3	3	2	3	2	2	2	3	2	2	2	2	2	2	2	2	2	3	4	4	4	3	4
6	4	3	3	3	3	3	4	4	3	4	3	4	3	3	4	4	4	4	3	2	2	3	2	3	3	3	3	3	3	4	3	2	2	3	2	2	3	3	2	2	3	2	2	2
7	3	3	4	3	4	4	3	3	3	3	4	4	3	3	3	4	3	4	4	4	3	4	3	4	3	4	4	4	4	3	4	2	2	3	3	2	2	3	3	2	3	3	3	3
8	4	4	3	4	4	4	3	3	4	4	3	3	4	3	4	3	4	3	4	3	3	3	3	3	3	3	3	4	3	4	4	3	3	4	4	4	3	4	3	5	4	5	4	5
9	4	4	3	4	4	4	4	3	3	4	4	4	3	3	3	4	4	3	3	4	3	4	4	4	4	4	4	4	3	3	3	2	2	3	2	3	2	2	3	2	2	2	2	2
10	3	3	4	3	3	4	4	3	3	3	4	4	4	4	4	3	4	4	3	3	4	4	3	3	4	4	4	5	4	5	5	3	4	4	3	4	3	3	4	3	3	3	4	4
11	3	3	3	3	4	4	3	4	4	3	3	3	4	3	4	2	2	2	3	3	2	3	3	3	2	3	3	3	3	4	3	3	3	2	2	2	3	3	3	3	3	3	4	3
12	3	3	3	3	3	3	3	4	4	4	4	4	3	3	4	3	3	3	3	2	2	3	2	2	3	3	3	3	3	3	3	2	2	2	2	2	2	3	2	3	3	3	3	4
13	4	5	4	4	5	5	5	4	5	4	4	5	4	5	4	4	4	4	4	4	4	4	3	4	4	4	4	5	4	4	5	3	3	4	4	4	3	3	4	4	4	5	4	4
14	4	4	3	3	3	4	4	4	3	3	3	3	3	3	3	3	4	3	3	2	3	3	2	3	3	4	3	3	3	4	3	2	2	3	3	3	3	2	3	3	3	3	4	3
15	4	4	3	4	4	3	4	4	4	3	4	4	4	4	3	2	3	2	2	3	4	4	4	4	4	3	4	3	4	3	4	3	2	2	2	2	3	3	2	4	3	3	3	3
16	3	3	3	3	3	4	3	3	3	4	4	3	3	3	3	4	4	4	3	4	3	4	3	4	3	4	4	4	3	4	3	4	3	4	4	4	4	3	3	3	3	3	4	3
17	4	4	4	4	3	3	4	4	4	4	3	4	4	4	4	4	4	4	5	3	4	3	3	3	4	3	3	4	3	3	3	3	3	3	3	4	3	3	4	2	2	2	1	2
18	3	3	3	4	3	4	3	4	4	4	4	4	3	3	3	3	3	3	4	4	3	4	4	4	3	3	3	3	3	3	3	2	2	2	2	3	2	2	2	2	3	2	2	2
19	3	3	3	3	4	3	3	4	3	4	3	3	3	4	3	2	3	2	2	2	3	2	3	2	3	3	3	2	2	3	2	2	2	3	2	2	2	3	3	2	3	3	3	3
20	2	2	3	3	2	2	2	3	3	3	3	2	3	3	3	3	3	4	3	2	2	2	2	2	2	2	2	3	3	2	3	2	1	1	1	1	1	2	1	1	1	1	1	1
21	4	3	3	3	4	4	4	3	3	3	4	3	4	4	3	2	2	3	2	3	4	4	4	3	3	3	3	3	3	4	4	4	3	4	4	4	4	4	3	4	4	4	4	4
22	4	3	3	4	4	4	4	4	4	4	3	4	3	3	3	2	3	3	3	3	4	4	3	4	4	4	4	4	4	4	4	4	4	3	3	4	3	3	4	3	3	3	2	2
23	3	4	3	3	3	4	3	4	4	4	4	3	4	3	3	3	4	3	4	4	3	3	3	3	3	3	3	4	3	4	3	2	3	3	2	2	2	2	3	3	3	3	4	3
24	4	3	4	4	3	3	3	4	4	4	4	4	4	4	4	2	2	3	3	3	4	3	3	4	3	4	3	4	3	4	3	2	2	3	3	3	3	3	2	4	4	4	4	4
25	4	4	4	4	4	4	4	4	4	4	3	4	3	3	3	3	4	4	4	4	3	3	3	3	3	4	4	4	5	5	5	4	4	4	5	5	4	4	4	4	3	4	4	3
26	3	4	4	3	3	3	3	3	3	3	4	3	3	3	4	3	4	4	3	3	4	4	4	4	3	3	3	4	4	3	4	3	3	3	3	2	3	2	2	3	3	3	4	3
27	3	4	4	3	3	4	4	3	4	3	3	4	3	4	4	3	2	3	2	3	3	3	3	3	3	4	4	4	4	4	3	3	3	3	3	3	3	3	3	3	3	3	4	3
28	3	4	4	3	4	4	4	3	4	3	4	3	4	3	3	4	3	3	3	3	4	4	4	3	3	3	3	2	3	3	2	2	2	3	3	3	3	3	3	2	2	3	3	2
29	3	3	3	3	4	3	4	3	3	3	3	4	4	4	3	2	2	3	3	3	3	2	3	3	2	3	3	4	3	4	3	2	3	3	2	3	3	3	3	2	3	2	2	2
30	3	4	4	3	4	3	4	3	3	3	4	4	3	3	4	3	3	2	3	2	2	3	2	3	2	4	4	4	3	4	3	3	3	4	3	3	3	3	3	2	3	2	3	2
31	3	3	4	3	4	3	3	3	4	4	4	3	3	4	3	3	2	2	2	4	3	4	4	4	3	3	3	3	3	3	3	3	3	3	2	3	3	3	2	4	4	4	4	4
32	4	4	4	4	4	3	4	4	4	4	4	4	4	3	3	4	3	4	3	4	3	3	4	4	3	4	3	4	4	4	4	3	3	3	3	2	2	3	3	3	3	3	2	3
33	4	5	4	4	4	4	4	4	5	5	4	5	5	5	4	4	4	5	4	3	4	3	3	3	4	5	4	5	4	4	4	3	3	4	3	4	3	4	4	2	3	2	2	3
34	3	3	3	4	4	4	3	4	4	3	3	4	4	4	3	4	3	3	3	3	4	3	4	3	4	4	4	3	4	3	3	2	2	2	3	2	2	2	2	1	1	2	1	2
35	3	3	3	4	3	4	4	4	4	3	4	3	3	4	4	4	3	3	4	4	3	4	3	4	3	3	3	4	3	3	3	3	3	3	3	3	3	3	2	3	3	3	3	3
36	4	3	3	4	4	4	4	4	4	4	4	4	4	3	4	3	3	4	3	5	4	5	4	5	5	4	4	5	5	5	4	4	3	3	4	3	3	3	4	3	2	3	3	3
37	3	4	3	3	3	4	3	3	3	4	3	3	3	3	4	4	4	3	3	3	4	4	4	4	4	3	3	4	4	4	4	3	4	3	3	4	4	3	3	3	3	3	3	3
38	3	3	4	4	4	4	4	4	4	3	4	4	4	3	4	3	3	3	4	4	3	3	4	3	3	4	4	4	3	3	4	3	3	4	3	4	3	3	3	3	3	3	2	3
39	3	4	3	4	3	3	4	4	4	4	3	3	3	3	4	4	3	4	3	3	4	4	3	3	4	3	3	3	4	4	4	2	2	2	2	3	2	2	3	2	3	2	3	2
40	5	4	5	5	4	5	5	4	5	5	4	5	4	5	4	3	4	3	4	3	3	4	4	4	4	4	4	4	5	5	5	3	3	4	3	4	4	3	4	3	3	2	3	3
41	2	3	2	3	3	3	3	3	3	3	3	3	2	3	3	2	3	3	3	2	2	3	3	3	3	3	3	3	3	3	2	1	2	2	1	2	1	2	2	3	3	3	3	3
42	3	4	3	4	4	4	4	4	4	4	3	4	3	3	3	4	4	3	4	3	3	4	4	3	4	3	3	4	4	3	3	3	3	2	2	2	2	2	3	3	2	3	3	3
43	3	3	4	4	4	3	3	3	4	4	3	3	4	4	4	2	2	3	3	2	2	2	3	2	3	2	2	2	2	2	3	2	2	3	2	2	2	2	2	2	3	3	3	2
44	5	5	5	5	5	4	5	5	5	5	4	5	4	4	5	4	3	3	4	3	3	3	4	4	4	4	5	5	5	5	5	3	4	4	3	3	4	4	4	2	3	3	3	3
45	4	4	5	4	4	4	4	4	4	4	5	5	4	4	4	4	4	3	3	3	3	2	2	2	3	3	4	3	3	3	3	3	3	3	3	3	3	3	4	3	3	3	2	3
46	3	4	4	4	4	4	4	4	4	4	3	4	4	4	4	3	4	3	4	4	3	4	4	4	3	4	3	3	4	3	3	4	3	4	3	4	3	3	3	3	3	2	2	2
47	5	5	5	4	4	4	4	5	4	4	5	5	4	4	4	4	3	4	4	5	4	5	5	5	4	5	4	5	5	5	5	4	4	3	3	4	3	3	4	3	2	3	2	3
48	5	5	5	4	5	4	4	4	5	4	4	4	4	4	5	4	4	3	4	4	3	3	4	3	4	4	5	5	5	5	5	4	5	4	5	5	4	4	4	3	3	3	3	3
49	4	3	3	3	4	4	3	3	4	4	3	3	3	3	4	2	2	3	3	3	4	3	3	3	3	3	4	4	4	4	4	3	2	3	2	3	2	2	2	2	2	2	2	2
50	4	3	4	4	3	4	4	4	4	3	3	4	3	4	3	4	3	3	3	4	5	4	4	5	5	4	5	4	5	5	4	3	3	4	3	4	4	3	3	3	3	3	3	3
51	3	4	4	3	4	4	3	3	3	4	3	3	4	3	3	3	2	3	3	3	3	3	3	3	3	3	3	3	4	4	3	2	2	2	2	3	3	2	3	2	3	3	2	3
52	5	5	5	4	5	5	4	4	4	4	4	5	5	4	5	4	4	4	4	4	4	4	4	4	4	4	5	5	5	5	5	3	4	3	3	4	3	4	3	3	3	3	4	3
53	3	4	4	3	3	4	3	3	3	4	3	3	4	3	3	3	2	3	3	5	5	5	4	5	5	3	4	4	4	4	4	4	5	4	5	5	4	4	5	3	3	4	3	3
54	3	4	4	4	4	4	4	4	4	4	4	4	4	4	4	3	3	3	3	4	4	3	4	3	4	4	3	4	4	3	3	2	3	3	3	2	3	3	2	3	2	3	3	2
55	4	3	3	3	4	4	4	3	4	4	3	4	4	4	4	3	2	3	3	3	3	3	3	3	3	2	2	3	3	2	2	2	2	2	3	2	2	2	2	3	3	2	3	3
56	4	4	3	4	4	3	3	4	4	4	4	4	4	3	3	3	4	3	3	4	3	3	4	4	3	5	5	5	4	4	4	3	4	4	3	3	4	4	4	3	3	2	3	2
57	3	4	3	3	3	4	4	3	3	4	3	3	3	3	4	4	4	4	3	3	4	3	4	3	4	3	3	3	3	3	3	3	3	3	3	4	3	4	3	3	3	3	3	3
58	3	3	4	3	3	3	3	3	4	3	3	3	3	4	3	4	4	4	3	4	3	3	4	4	3	4	3	4	3	4	3	3	3	4	3	3	3	3	4	3	3	3	2	2
59	3	3	3	3	3	3	4	4	3	3	3	4	4	3	4	4	4	4	5	4	4	4	4	4	4	4	4	4	4	4	3	3	4	3	4	4	3	3	3	3	3	3	3	3
60	5	4	4	4	5	5	5	5	4	4	4	5	5	5	5	4	4	4	4	4	4	5	4	5	5	5	5	4	4	5	4	3	3	3	4	4	4	3	4	3	3	2	2	3
61	3	3	4	4	3	3	3	3	4	4	4	4	3	3	3	3	3	4	4	3	3	4	3	3	3	3	4	4	3	3	3	3	2	3	3	2	2	3	3	3	2	3	3	3
62	4	4	3	4	3	4	3	4	4	4	4	3	3	3	3	3	3	3	4	4	4	4	4	4	4	3	3	3	4	3	3	4	3	3	3	4	3	4	4	2	3	3	3	3
63	4	3	3	4	4	3	3	4	3	4	3	4	3	3	3	4	4	4	3	2	2	3	3	3	2	2	2	3	3	2	3	3	3	2	3	2	2	3	2	4	3	4	3	4
64	5	4	5	4	4	4	5	5	4	4	5	5	5	4	5	4	4	4	5	5	5	5	5	5	5	5	5	5	4	5	5	3	3	4	4	4	4	4	3	3	3	2	3	2
65	3	3	3	4	3	3	3	4	3	3	4	4	3	4	3	4	4	4	4	4	4	4	4	4	4	3	3	3	3	3	3	3	3	4	4	4	3	3	3	3	2	3	3	2
66	3	3	4	3	3	3	3	3	3	4	3	4	4	4	3	4	4	3	3	3	3	4	3	3	3	4	4	4	3	4	4	4	3	4	4	4	3	4	4	2	3	2	3	3
67	3	4	3	4	3	3	4	4	3	4	4	3	4	4	3	3	4	4	4	4	4	4	4	4	4	3	3	3	4	4	4	3	3	3	3	4	3	3	4	4	3	3	4	3
68	3	2	3	2	2	3	3	2	2	2	3	3	2	2	3	2	2	3	3	3	3	3	3	3	3	3	3	2	3	3	2	1	2	1	1	2	2	2	2	2	3	3	2	3
69	3	4	4	3	3	4	4	4	3	4	4	4	4	3	3	4	5	4	4	3	3	3	4	3	4	4	4	5	4	4	5	3	4	3	4	4	4	3	3	2	3	2	2	2
70	3	3	3	4	3	4	3	3	4	4	3	3	4	4	3	4	4	4	3	4	4	3	4	3	3	4	4	3	3	3	4	4	3	4	4	4	4	4	3	3	3	3	3	3
71	3	3	4	3	4	3	4	4	3	4	4	3	3	3	4	3	3	4	4	2	2	2	2	2	2	3	3	3	4	3	4	3	2	2	3	2	2	3	3	3	3	3	4	3
72	5	4	4	5	5	5	4	4	5	4	4	5	5	4	5	3	4	3	3	3	3	3	4	4	4	3	3	4	3	4	4	3	3	3	4	4	3	3	3	3	3	3	3	2
73	5	4	5	5	4	4	5	5	5	4	5	4	5	4	5	3	4	4	4	5	4	4	4	5	4	4	4	4	5	4	5	3	4	3	3	4	4	3	3	3	3	2	2	3
74	2	3	3	3	3	3	2	2	2	2	3	3	2	2	3	3	2	2	3	3	3	3	4	3	3	2	2	2	2	1	2	2	1	2	2	2	2	2	2	3	3	2	2	2
75	3	4	4	3	4	3	3	4	4	4	4	4	4	4	4	3	2	2	2	3	3	3	3	3	3	3	3	3	3	3	3	2	2	2	3	2	2	2	2	2	2	3	2	3
76	4	3	4	3	3	3	3	3	3	4	3	3	3	4	4	4	4	4	3	3	3	4	3	4	3	4	4	3	4	3	3	3	4	4	3	4	4	4	3	2	3	3	2	2
77	3	3	4	3	3	3	3	3	3	4	3	4	4	3	4	5	4	4	5	5	4	5	5	5	4	4	4	4	3	3	3	4	5	4	4	4	4	5	4	3	3	3	3	3
78	3	4	3	3	3	3	3	4	4	4	3	4	4	4	4	2	2	2	3	3	3	3	4	4	3	3	3	4	4	4	3	2	2	3	3	2	3	3	3	3	3	2	3	3
79	4	5	4	4	5	4	4	5	4	4	4	4	5	5	4	3	4	4	4	4	4	4	4	4	4	5	4	5	4	5	5	3	3	4	4	3	3	3	3	3	3	4	3	4
80	5	5	4	5	5	5	5	5	5	5	5	4	5	5	4	3	3	2	3	3	3	3	3	3	3	4	4	3	4	4	4	3	3	3	4	4	3	3	4	4	4	5	4	5
81	5	5	5	4	4	4	5	5	4	4	4	5	5	5	4	3	2	2	3	4	4	4	3	3	4	3	3	4	4	3	4	5	5	5	5	4	4	4	4	3	3	4	3	4
82	2	2	2	3	3	3	2	3	2	2	3	2	3	3	2	4	3	4	3	3	3	3	3	2	2	2	2	2	3	2	2	1	2	2	1	2	2	2	2	3	3	2	3	2
83	5	5	5	5	4	4	4	5	5	5	4	5	4	4	4	4	4	4	3	4	4	4	3	4	3	5	5	4	4	5	4	4	5	4	4	4	4	4	5	3	3	3	4	3
84	3	4	3	3	4	4	4	4	3	4	4	4	3	3	3	3	3	2	2	3	4	3	4	3	4	3	3	4	3	4	4	3	3	2	2	2	3	3	2	2	3	3	2	3
85	5	4	4	5	4	5	4	5	5	4	4	4	4	4	4	3	4	4	3	4	3	4	4	3	3	3	3	4	3	4	4	5	4	4	4	4	4	4	5	3	3	3	4	4
86	4	4	3	3	4	4	4	3	3	4	4	3	3	4	4	3	4	3	3	4	4	4	3	4	4	4	4	4	3	4	4	3	2	3	3	2	3	3	2	3	3	3	4	4
87	4	3	3	4	4	4	4	3	4	3	3	4	3	4	4	3	4	3	3	3	3	3	3	3	3	4	4	3	4	3	4	3	2	2	2	2	2	3	3	3	4	3	4	3
88	3	4	3	3	3	3	3	3	3	3	4	4	4	4	3	3	2	3	3	4	5	4	4	4	5	3	3	4	4	3	3	3	4	3	4	4	4	4	3	3	3	3	4	4
89	2	3	2	2	2	2	3	3	2	3	3	3	3	3	2	2	2	3	2	1	2	1	2	2	2	2	2	2	2	2	3	2	1	2	2	2	1	1	2	2	3	3	3	2
90	3	4	4	4	3	3	4	4	4	4	4	4	3	4	4	3	3	4	4	4	5	4	4	5	4	3	3	4	3	3	4	5	5	5	5	5	5	4	4	4	4	3	3	4
91	3	4	4	4	4	4	3	4	4	4	4	3	4	3	4	4	4	4	3	4	3	4	3	4	4	5	5	4	4	4	4	3	4	3	3	4	3	3	3	4	3	3	4	3
92	4	4	4	4	5	5	5	4	4	5	5	5	5	4	4	3	4	4	4	5	4	5	4	5	5	5	5	5	4	5	5	4	3	4	3	4	3	4	4	3	3	3	4	4
93	5	4	4	4	5	4	4	4	5	4	4	4	5	4	5	4	4	4	4	5	5	4	5	4	5	4	4	4	4	4	4	4	3	3	3	4	3	3	3	3	3	3	4	3
94	3	3	3	3	3	3	4	4	4	4	4	3	3	3	4	3	3	3	2	3	3	3	3	3	3	4	4	4	4	3	4	2	3	2	3	2	2	2	3	3	3	3	4	3
95	4	3	3	3	3	3	3	3	3	4	3	4	3	3	3	4	5	5	5	4	4	4	4	4	4	3	3	3	4	4	4	3	3	3	2	2	3	3	2	3	3	3	3	2
96	4	3	4	3	4	4	4	4	3	4	4	4	4	3	3	3	3	4	4	4	4	4	4	4	4	3	3	4	4	4	4	4	3	4	3	3	3	3	4	2	3	2	2	3
97	4	4	3	4	3	3	4	3	4	3	3	3	3	3	4	4	4	4	3	3	3	3	3	3	3	3	3	3	3	3	3	2	3	2	2	2	2	2	3	3	4	3	3	3
98	2	2	2	3	3	3	3	2	3	2	2	2	3	3	3	3	3	3	4	4	4	4	4	4	4	4	4	4	4	4	4	3	4	4	4	4	4	4	4	2	3	2	2	3
99	4	5	4	4	4	5	4	4	4	4	4	4	4	4	5	3	4	4	4	4	3	4	4	4	4	4	3	4	4	4	4	3	3	3	4	4	3	3	3	4	3	3	4	3
100	3	3	3	4	4	4	4	4	4	4	3	4	3	4	4	3	4	4	3	3	3	3	3	3	3	4	4	3	3	4	4	2	2	2	2	3	2	2	3	2	3	2	2	2
101	4	3	3	3	4	3	3	4	3	4	4	4	3	3	4	4	5	4	4	3	3	3	3	3	3	3	3	4	3	4	4	2	2	3	3	2	2	3	2	3	3	3	4	3
102	5	4	4	4	5	4	4	5	4	4	4	5	5	5	4	4	4	4	3	3	4	4	4	4	4	4	4	4	3	4	3	3	4	4	4	4	3	3	3	2	3	2	3	3
103	3	3	3	2	2	3	2	2	2	3	2	3	2	3	3	3	2	2	3	3	3	3	3	3	2	2	2	2	2	2	2	2	3	2	2	2	2	3	3	4	3	4	4	3
104	5	4	4	5	4	5	4	4	4	4	5	5	4	4	4	4	4	4	5	5	5	5	5	5	4	4	4	4	3	3	4	3	4	4	3	3	4	4	4	2	3	2	2	3
105	5	4	4	5	4	5	5	4	4	5	4	4	5	5	4	4	3	3	3	4	4	4	4	3	3	3	3	4	4	4	3	3	3	4	3	3	3	3	4	3	4	3	4	3
106	5	5	5	4	5	5	4	4	5	5	4	4	5	5	5	3	4	4	4	4	3	4	3	4	3	5	4	4	4	5	5	4	3	3	4	4	3	3	3	4	3	3	4	3
107	5	5	4	4	4	5	4	4	4	5	4	4	5	4	4	3	4	3	4	4	4	4	4	4	4	3	3	4	3	4	4	3	3	3	3	3	3	3	4	3	3	3	3	3
108	4	4	3	4	4	3	3	3	3	3	3	3	3	3	3	3	4	3	3	3	3	3	4	3	3	4	4	3	3	3	4	2	2	3	3	3	2	3	3	2	3	3	3	3
109	4	4	4	5	4	4	4	4	5	4	4	5	4	5	5	4	4	3	4	5	4	4	4	5	4	4	4	3	4	4	4	3	4	3	3	4	3	4	4	3	3	4	4	3
110	3	4	4	3	4	3	4	4	3	4	3	3	4	3	3	3	4	4	3	3	3	3	3	3	3	3	3	3	4	3	4	2	3	2	2	3	2	3	3	2	2	2	2	2
111	4	4	5	4	4	4	4	4	5	4	4	4	4	5	5	3	3	4	4	4	4	4	4	4	4	3	3	4	3	4	4	3	4	3	4	4	4	3	4	2	3	3	3	3
112	3	3	3	3	2	3	3	2	3	3	3	2	3	2	2	2	2	2	3	2	2	2	2	3	3	2	2	3	2	2	2	2	2	1	1	2	2	2	2	3	3	3	3	3
113	4	5	5	5	5	4	5	5	4	4	4	4	5	4	5	4	4	3	3	4	4	4	4	4	4	4	3	4	4	3	4	4	3	4	4	3	4	4	3	4	3	4	4	3
114	4	3	3	3	3	3	4	4	3	3	3	4	3	3	3	2	1	2	2	2	2	2	3	3	2	4	4	3	3	4	4	3	3	4	3	3	3	3	4	4	4	4	4	4
115	3	2	3	2	2	3	3	3	2	2	3	3	2	3	3	3	4	4	3	3	3	3	3	3	3	2	3	2	3	3	3	3	3	3	3	2	3	3	3	2	3	2	2	2
116	4	3	3	3	4	3	4	4	4	4	3	3	4	4	3	4	3	4	3	4	3	4	4	4	4	4	4	4	4	3	4	2	3	3	2	2	2	3	2	3	4	4	4	3
117	3	4	4	3	3	3	3	4	4	4	4	4	3	4	4	3	4	3	3	3	3	2	2	3	3	4	3	3	3	4	3	2	2	2	3	3	3	2	3	3	4	3	3	4
118	2	2	3	3	3	2	2	2	3	2	3	2	3	2	2	4	3	4	3	2	2	2	2	3	2	3	4	4	3	3	4	3	3	4	3	3	3	3	4	4	3	3	4	3
119	2	2	2	2	3	3	3	3	2	2	2	3	2	3	3	4	4	4	3	3	3	2	2	3	3	3	3	2	2	2	3	1	2	2	1	1	2	2	2	2	3	2	3	3
120	5	5	5	5	4	4	4	5	5	4	4	4	5	5	4	3	4	4	4	5	5	4	4	5	4	4	4	4	4	4	4	3	4	3	3	3	3	4	3	4	3	3	4	3
121	4	4	3	4	3	4	4	3	4	4	3	4	4	3	4	4	4	4	3	3	3	4	3	3	3	3	3	3	3	3	3	4	3	3	4	4	3	3	3	2	3	3	2	2
122	4	4	4	4	4	5	5	5	5	4	5	5	4	5	5	5	4	4	4	4	4	5	4	5	4	5	5	4	4	5	5	3	4	4	4	4	3	4	3	3	4	3	4	3
123	3	2	2	3	3	3	2	3	3	3	3	3	3	2	3	2	2	2	2	2	2	2	3	2	3	2	2	2	2	2	2	1	1	2	1	2	2	1	1	3	3	2	3	2
124	3	3	4	3	3	3	4	3	3	4	4	3	4	3	4	3	4	4	4	4	4	4	4	4	3	3	3	3	3	4	3	3	4	3	3	4	3	4	3	3	3	3	4	3
125	4	4	3	4	3	3	4	3	4	4	3	4	3	4	4	4	4	3	3	3	3	4	4	3	4	4	4	4	4	4	4	3	3	2	3	2	3	3	3	4	3	3	3	4
126	4	4	4	3	3	4	4	4	3	4	4	3	4	3	4	3	4	4	4	4	4	3	4	4	3	3	3	4	4	3	4	4	4	3	4	4	4	4	3	3	3	3	4	4
127	4	4	3	3	4	4	4	3	4	4	4	4	3	4	4	3	3	3	3	4	4	4	3	4	3	4	4	4	3	4	3	2	2	2	2	3	2	2	3	4	4	4	3	3
128	3	2	3	2	3	2	3	3	2	2	3	3	2	3	2	3	2	3	3	3	3	3	3	3	2	3	3	2	2	2	3	3	3	2	2	2	2	3	2	3	3	4	4	3
129	4	4	4	3	3	4	4	4	3	4	4	4	3	3	4	3	3	3	2	2	3	3	2	2	3	3	3	3	3	3	4	3	3	2	3	2	2	3	3	3	3	4	4	3
130	2	3	2	3	3	3	3	3	3	3	2	2	2	2	3	3	3	3	3	3	2	3	3	3	2	4	4	4	4	4	4	3	4	4	3	4	3	3	4	3	4	4	3	3
131	4	4	4	4	3	3	4	3	4	4	4	3	3	3	4	4	4	5	4	3	3	4	4	4	3	3	3	3	4	4	4	4	3	3	4	3	3	3	3	3	3	3	3	2
132	4	4	4	4	3	4	4	3	3	3	3	3	4	3	4	4	4	3	3	5	5	5	5	5	4	4	4	4	4	3	3	4	5	4	4	4	4	5	4	3	3	3	3	3
133	3	3	3	4	3	4	3	3	4	3	4	3	3	3	4	3	3	3	2	4	3	4	4	3	4	4	4	3	3	4	4	3	3	3	3	3	3	3	3	3	3	4	3	3
134	4	4	4	3	4	4	3	3	4	3	3	3	4	3	4	4	4	3	3	4	4	4	4	4	4	3	3	4	4	4	4	3	3	4	3	4	3	4	4	3	3	3	3	3
135	3	3	3	3	2	3	3	3	2	2	3	3	3	3	3	2	1	1	2	2	2	3	2	2	2	3	2	2	2	2	2	3	3	3	3	3	3	3	2	3	4	3	4	4
136	4	3	4	3	4	3	3	3	4	4	3	3	4	4	4	3	4	3	3	3	3	3	3	3	3	3	3	2	2	3	3	2	3	3	3	2	2	2	3	3	3	4	3	3
137	4	4	4	4	4	4	4	3	4	4	3	4	3	3	4	2	2	1	1	3	4	3	4	3	4	4	4	4	4	4	3	3	4	4	3	4	3	3	4	4	4	4	4	4
138	3	3	3	4	4	4	4	4	4	4	3	4	4	3	4	3	3	3	4	3	4	4	3	4	3	3	3	3	3	4	4	3	3	4	4	3	3	3	3	3	4	3	4	3
139	3	3	4	3	4	4	4	4	4	4	3	3	4	4	4	3	4	4	3	3	3	3	3	3	4	4	4	3	3	3	3	3	4	4	3	4	4	3	4	3	3	3	3	3
140	4	3	4	3	4	4	4	4	3	4	3	4	3	3	4	4	4	4	3	3	4	4	4	4	3	3	3	3	3	4	4	4	3	3	4	4	3	3	3	4	4	3	3	3
141	4	4	4	3	4	4	3	4	3	4	4	4	4	3	4	3	4	4	4	4	3	3	3	4	3	4	4	4	4	4	4	4	3	4	3	3	4	3	3	3	3	3	4	3
142	4	5	4	4	5	4	5	5	4	4	5	5	5	4	4	4	4	4	5	5	5	5	5	5	4	4	4	4	4	3	4	5	5	4	5	4	5	4	4	3	3	4	4	3
143	4	4	4	3	3	3	3	3	3	4	4	4	4	4	3	1	1	2	2	2	2	2	3	2	2	3	3	2	2	3	3	2	3	3	2	3	2	2	3	3	3	3	2	3
144	4	4	4	4	4	4	4	3	4	4	4	4	3	4	4	3	3	4	3	3	4	3	4	3	3	3	3	3	3	3	3	3	3	2	2	2	3	3	2	3	3	3	3	4
145	4	3	4	4	3	4	4	4	3	3	3	4	4	4	4	2	3	2	3	2	3	3	3	3	2	3	3	3	2	3	3	2	2	3	3	2	3	2	2	4	3	4	3	3
146	3	3	3	4	3	4	3	4	3	4	4	4	3	3	4	4	3	3	3	3	3	4	3	3	3	4	4	3	3	3	4	4	4	4	4	4	3	3	3	3	3	4	3	4
147	3	4	3	3	3	4	4	4	4	4	4	3	4	4	4	3	3	3	4	4	4	3	4	3	4	4	4	4	3	4	4	3	3	3	3	3	3	3	3	3	3	3	4	3
148	3	4	3	4	3	4	3	4	3	4	3	4	4	3	4	3	4	3	4	3	4	4	3	4	3	3	3	4	3	3	3	3	4	4	3	3	3	3	3	4	4	3	4	4
149	4	4	3	4	4	4	3	3	4	3	4	4	3	3	4	3	3	3	3	3	3	3	3	3	2	4	4	3	4	3	4	3	3	3	3	3	3	3	4	3	3	3	3	3
150	4	4	3	4	3	4	4	3	3	4	4	4	4	4	4	4	3	3	4	2	2	3	2	3	2	3	3	4	4	4	4	4	3	4	4	4	3	4	3	3	4	3	4	3
151	4	4	5	4	5	5	4	5	5	5	4	5	5	5	4	3	3	4	4	4	5	4	4	5	5	4	5	5	4	5	5	4	4	3	3	4	3	3	4	3	3	2	3	3
152	3	3	3	3	3	3	3	3	3	2	3	3	3	2	3	2	2	3	2	2	2	2	2	3	2	2	2	3	2	2	2	2	2	2	3	2	2	2	2	3	3	3	3	3
153	4	3	4	4	4	4	4	4	3	4	3	4	4	4	4	4	3	4	3	3	4	4	4	4	3	3	3	4	3	4	3	3	3	3	3	3	2	2	3	4	3	3	3	3
154	4	4	3	4	4	4	3	3	4	3	4	3	4	4	4	2	2	3	3	3	3	3	3	3	2	4	4	3	4	3	4	2	2	2	3	3	3	3	3	3	4	3	4	3
155	3	3	3	3	3	3	3	2	2	3	3	3	3	2	3	3	3	2	2	2	2	3	3	2	3	4	4	4	4	4	4	3	3	3	4	4	4	3	4	3	3	4	4	3
156	4	3	3	3	3	4	4	4	4	4	4	3	3	3	4	4	4	4	3	3	4	4	4	3	4	3	3	3	4	4	3	4	5	5	5	4	5	5	4	3	4	4	3	4
157	3	4	3	4	4	3	4	4	4	4	3	4	3	4	4	3	4	3	3	3	4	4	4	4	3	4	4	4	4	4	4	4	3	3	3	3	4	4	3	3	4	4	3	4
158	4	5	4	4	5	5	5	4	4	4	4	5	5	5	4	3	4	3	4	4	4	5	4	5	5	4	4	5	5	4	5	3	3	3	4	4	4	3	3	3	3	3	3	3
159	3	3	3	4	4	3	4	3	3	4	4	3	4	4	4	2	2	2	3	2	3	2	2	3	3	3	3	4	4	3	4	3	2	2	2	3	2	2	2	3	4	3	4	4
160	3	3	4	3	3	3	4	4	4	4	3	3	4	4	4	2	2	3	3	3	4	3	3	4	3	4	4	4	3	4	4	4	3	3	4	4	4	4	3	3	3	4	3	3
161	4	4	3	3	3	3	4	3	4	4	4	3	4	3	4	3	3	4	4	4	3	4	4	4	4	4	3	3	3	4	4	3	3	3	3	3	3	3	4	4	4	3	3	4
162	4	4	4	3	4	3	3	4	3	3	3	4	3	3	4	3	3	3	3	3	3	3	4	3	3	3	3	2	2	3	3	3	3	3	3	4	3	3	3	4	4	4	4	3
163	3	3	2	2	3	2	2	3	3	2	2	3	3	3	2	4	4	3	3	3	3	3	3	3	3	2	2	2	3	2	2	1	2	2	2	2	2	2	1	3	3	3	3	4
164	3	4	3	4	4	4	3	4	4	3	3	3	4	4	4	4	4	3	4	4	4	3	3	3	4	3	3	4	3	3	4	4	4	5	5	4	4	4	5	3	4	3	4	4
165	3	4	3	3	4	4	4	4	4	3	3	4	4	3	4	4	4	4	4	4	4	5	4	5	5	4	5	4	5	5	5	4	3	3	3	4	3	3	3	3	3	3	3	3
166	3	4	4	4	3	4	3	4	3	3	3	4	4	3	4	2	3	2	3	3	3	3	3	3	3	4	4	4	3	3	3	3	2	2	2	2	3	3	3	4	3	3	4	3
167	4	3	4	4	4	4	3	3	3	4	3	3	3	3	4	3	2	3	2	4	4	3	4	3	3	2	2	2	3	3	3	3	2	2	3	2	2	2	2	3	3	4	3	3
168	4	3	4	4	4	3	4	4	4	4	4	4	4	4	4	3	4	4	3	3	3	4	3	3	4	3	3	3	3	3	3	2	3	2	2	2	3	3	2	3	3	3	4	3
169	3	3	4	3	4	4	4	3	3	3	3	3	4	3	4	4	4	4	4	4	4	4	4	4	4	4	3	4	4	4	4	3	2	3	2	2	3	3	3	3	3	3	4	3
170	3	4	3	4	3	4	4	4	3	4	3	3	3	3	4	3	2	3	2	2	2	3	3	3	2	3	3	3	3	3	3	3	4	3	4	4	4	3	4	4	3	4	3	3
171	4	4	3	4	3	4	4	4	4	4	4	4	4	4	4	2	2	3	2	2	3	3	2	2	2	3	3	2	3	2	3	2	2	3	3	3	3	3	2	3	3	3	3	3
172	3	3	4	4	4	4	4	3	3	3	4	3	3	3	4	3	4	4	3	3	4	3	3	3	4	4	4	3	3	4	3	2	3	2	2	2	2	3	2	3	4	3	4	3
173	3	3	4	4	4	3	3	4	3	4	3	3	3	3	4	3	4	4	4	2	2	2	2	2	3	4	4	4	3	4	3	3	3	4	3	3	3	4	3	3	4	4	4	3
174	2	2	3	2	3	2	2	2	3	3	2	3	3	3	3	2	2	2	2	2	2	3	3	3	2	4	4	3	4	4	4	4	3	3	3	4	4	3	4	2	3	2	2	2
175	5	5	5	4	4	5	4	4	4	4	5	5	4	4	4	5	5	4	5	5	5	5	5	5	5	5	5	5	5	5	5	4	5	4	5	5	4	4	4	3	3	3	4	3
176	3	3	3	4	3	4	3	3	3	4	3	3	3	3	4	2	3	2	3	3	4	3	3	3	3	4	4	3	4	3	3	2	3	3	3	2	3	3	3	3	4	3	3	4
177	4	5	4	5	4	5	4	5	4	5	4	4	4	4	5	3	4	3	4	4	4	4	4	3	4	3	3	4	3	4	4	3	4	4	3	4	3	3	3	3	4	4	3	3
178	3	4	3	3	3	3	3	3	3	4	3	3	4	4	3	2	2	3	3	3	3	3	3	3	3	3	3	3	3	3	4	3	2	2	3	3	3	2	2	3	3	4	4	3
179	4	4	5	4	5	4	5	4	5	5	5	4	4	4	4	5	4	5	5	5	5	4	4	4	5	4	4	4	4	4	5	4	3	4	4	4	3	4	3	3	4	4	4	4
180	3	4	4	3	3	4	3	3	4	3	3	3	3	4	3	4	3	4	4	3	3	3	3	4	4	4	3	4	3	3	4	3	3	4	3	4	3	4	4	3	3	4	3	3
181	4	3	4	4	3	4	4	4	3	4	3	4	4	3	4	3	3	2	2	2	2	3	3	3	3	4	4	3	4	3	3	4	4	3	4	4	4	3	4	4	4	4	4	5
182	4	5	4	5	5	5	5	5	4	4	5	5	5	5	4	5	4	4	5	4	4	4	4	4	4	4	4	3	3	4	3	4	4	4	4	4	4	4	4	3	3	3	4	4
183	3	3	3	3	4	3	4	3	4	3	4	3	3	3	3	3	4	4	4	3	3	4	3	4	4	3	3	3	3	3	3	3	3	2	3	2	3	2	3	4	3	4	4	3
184	4	5	4	5	4	5	4	4	5	4	5	5	5	4	5	3	3	3	3	3	4	3	4	3	3	4	4	4	4	4	4	3	4	3	4	3	4	3	3	4	4	4	3	4
185	3	4	3	4	3	4	3	3	4	3	4	4	3	3	3	4	5	4	4	4	3	4	3	4	4	4	4	3	3	3	3	4	3	3	3	4	3	3	3	3	3	3	4	3
186	3	3	4	4	3	4	4	3	4	4	3	3	3	4	3	2	3	2	3	3	4	3	4	3	4	3	3	4	4	4	4	2	3	3	2	2	2	2	3	3	4	3	3	4
187	3	3	4	4	3	4	4	4	4	3	4	4	3	4	3	3	3	3	4	4	4	4	3	4	4	3	3	4	4	4	3	4	3	4	3	4	3	3	4	3	4	4	4	4
188	3	3	3	3	4	4	3	3	3	4	3	4	3	4	3	4	3	4	3	3	3	3	4	3	3	4	4	3	3	3	3	5	4	5	5	5	4	4	4	4	4	4	4	4
189	4	5	4	5	5	4	4	5	4	4	5	5	4	5	5	3	4	4	3	4	4	4	4	4	4	3	3	4	3	3	4	4	3	3	4	4	4	4	4	3	3	3	4	4
190	3	4	4	3	3	3	4	4	3	4	3	4	4	3	3	3	4	4	3	3	3	2	3	3	3	3	3	3	3	3	3	3	3	3	2	2	2	2	2	4	4	3	4	3
191	3	4	3	4	4	4	4	3	3	3	4	4	3	3	3	5	5	5	4	3	4	3	3	4	4	4	4	3	4	3	4	4	3	4	3	4	3	3	4	4	4	4	5	4
192	4	4	4	5	4	4	5	4	5	5	5	4	5	5	5	4	3	4	3	3	3	4	4	3	3	3	3	4	3	4	4	3	3	3	4	3	3	3	4	4	4	5	4	4
193	5	5	4	4	4	4	4	4	5	4	4	5	5	4	5	3	4	4	4	4	5	5	5	4	4	5	5	4	4	4	4	4	4	3	3	4	3	3	3	2	3	2	3	2
194	3	4	4	3	4	4	4	3	4	4	4	4	3	3	3	2	3	3	3	4	4	3	4	3	3	4	4	4	3	3	3	3	3	4	4	4	3	3	4	4	4	5	5	5
195	4	4	4	4	3	3	3	4	3	4	3	3	3	3	3	3	4	3	3	3	3	4	3	4	3	3	3	4	4	3	3	4	4	3	3	4	4	4	3	3	3	3	3	3
196	5	4	4	5	4	4	5	5	4	4	4	5	5	5	5	3	3	3	4	4	4	4	4	4	4	4	4	3	4	4	3	3	3	3	4	3	3	4	4	3	4	3	3	3
197	5	5	5	4	4	5	4	4	4	5	4	4	5	4	4	2	3	3	2	2	2	3	2	2	3	3	3	3	3	3	3	3	2	3	3	3	3	3	3	4	3	3	4	3
198	4	5	4	4	4	5	5	5	5	4	4	5	4	5	5	4	3	4	4	4	4	4	4	4	4	4	4	4	4	4	3	4	4	4	3	3	4	4	3	4	4	3	4	3
199	4	4	3	4	3	4	4	3	4	4	3	4	3	3	4	3	4	3	3	3	4	3	4	3	3	3	3	3	4	4	4	2	3	2	2	2	3	2	2	3	4	3	4	3
200	5	5	4	4	4	5	5	4	4	4	4	4	5	4	4	4	3	3	3	5	5	4	5	4	5	4	4	5	5	5	5	4	4	3	4	4	4	4	3	4	3	4	3	3
201	5	5	5	5	4	4	4	5	4	5	5	5	5	5	5	3	3	4	4	4	4	5	4	5	5	4	4	4	4	4	4	4	3	4	3	3	3	3	4	4	3	3	4	3
202	3	3	3	4	4	4	3	3	4	4	3	4	3	3	4	3	4	4	3	3	2	3	3	3	2	3	3	4	4	4	3	3	2	2	2	2	2	2	3	3	4	4	4	4
203	3	4	3	3	3	3	4	3	4	4	4	3	3	3	3	3	3	2	2	4	4	3	4	4	4	4	4	4	3	3	4	4	3	4	3	4	3	3	3	4	4	4	3	4
204	2	3	3	3	3	2	2	3	3	2	3	2	2	3	3	2	2	2	3	3	3	3	2	3	3	3	3	3	3	2	3	2	2	2	1	1	1	2	2	2	3	2	3	2
205	4	4	4	3	3	3	4	3	4	4	4	4	3	4	4	3	4	4	4	4	4	4	4	4	4	4	4	4	3	4	4	3	3	3	3	4	3	3	3	3	3	3	4	3
206	4	4	4	5	5	4	4	5	4	4	4	5	4	4	5	3	2	3	3	3	4	4	3	4	3	4	3	3	3	3	4	4	4	4	3	3	4	3	4	3	3	3	3	2
207	3	4	3	4	4	4	4	4	4	4	3	3	3	3	4	3	2	2	2	4	3	3	3	3	4	4	4	4	3	3	3	3	3	3	3	2	3	3	3	3	4	3	3	3
208	2	2	2	3	3	2	3	3	3	2	2	2	3	2	3	3	2	3	2	4	4	3	4	4	3	3	3	4	4	3	4	3	3	3	4	3	3	3	4	3	3	3	4	3
209	4	4	4	4	3	4	4	3	4	4	3	4	3	4	4	4	4	4	3	3	3	3	3	3	4	4	4	4	4	4	4	3	4	4	4	3	4	3	3	3	3	3	3	3
210	4	5	4	5	4	5	5	5	5	4	4	5	5	5	4	5	4	4	4	4	4	4	4	4	3	4	4	3	3	3	4	3	3	3	3	4	3	3	4	3	3	3	3	2
211	5	5	5	5	5	5	5	5	5	4	4	4	4	4	5	5	4	4	5	3	3	3	3	4	4	5	5	5	5	5	5	4	5	5	5	4	5	5	4	4	3	4	4	3
212	4	4	4	4	4	4	4	4	4	3	3	3	4	3	4	2	2	2	2	4	3	4	4	3	3	3	3	3	3	3	3	2	3	3	2	2	2	2	2	3	3	3	4	4
213	3	4	3	4	3	3	3	3	4	4	3	4	4	3	4	4	4	4	3	3	3	4	4	4	3	3	3	4	3	4	3	2	2	2	3	2	2	3	3	4	3	4	3	3
214	4	4	4	4	4	5	5	4	4	4	4	5	5	4	4	3	4	3	4	4	4	4	4	4	4	4	4	4	3	3	4	3	3	4	3	3	3	4	4	3	3	3	3	4
215	4	5	4	5	4	5	4	4	5	4	4	5	4	4	5	2	3	2	3	3	4	3	3	4	4	4	4	3	3	4	4	5	5	5	4	4	4	5	5	4	3	3	4	3
216	5	4	5	5	4	5	5	4	5	4	5	5	5	4	4	5	4	4	5	4	5	5	4	5	5	3	3	4	3	3	4	3	3	4	4	4	4	4	4	3	3	3	3	2
217	4	3	3	4	3	4	4	4	3	3	4	3	3	3	4	4	4	4	4	3	4	3	3	4	4	4	4	3	4	4	4	3	3	3	3	4	3	3	3	4	3	3	4	3
218	4	4	4	3	3	3	3	3	4	4	3	4	3	4	4	2	2	3	3	3	3	4	3	3	4	3	3	2	2	3	3	3	3	2	2	2	2	2	2	4	3	3	4	3
219	5	5	5	4	4	4	4	5	5	4	4	5	5	5	5	3	4	4	4	4	4	3	4	4	3	4	4	3	3	4	4	3	3	2	2	3	2	2	3	2	3	3	2	2
220	3	3	4	3	4	4	4	4	4	4	3	4	4	4	3	4	4	4	5	5	5	4	5	5	4	3	3	4	4	4	4	5	5	4	5	5	4	4	4	3	3	4	4	3
221	3	4	3	3	4	3	3	4	3	3	3	3	3	3	3	3	2	3	3	3	3	3	3	3	3	3	3	3	4	3	3	3	3	4	3	4	3	4	3	4	3	4	3	4
222	4	5	5	5	5	5	4	4	4	5	5	4	5	5	5	5	4	5	5	5	5	5	5	5	5	5	5	4	4	5	4	4	4	4	4	4	4	4	4	3	4	4	4	3
223	4	4	4	5	5	4	4	4	4	4	5	5	5	5	5	4	4	4	4	3	4	3	4	4	4	4	4	3	4	4	4	3	3	3	3	4	3	3	3	3	3	3	3	3
224	4	4	4	5	4	4	4	4	4	4	4	5	5	5	5	3	2	2	3	4	3	4	3	3	3	4	3	4	4	4	4	3	3	4	4	3	3	3	4	3	4	4	4	3
225	4	5	5	5	4	4	5	5	4	4	5	4	5	5	5	3	4	4	4	3	4	3	4	4	4	4	4	3	4	3	3	3	3	3	3	4	3	3	3	2	3	3	3	3
226	3	3	4	3	3	3	4	4	4	4	4	3	4	4	3	3	4	4	4	4	3	4	3	3	4	4	3	4	4	3	4	4	4	5	4	4	4	4	4	4	3	4	4	4
227	4	5	5	4	5	5	5	5	5	5	5	5	5	5	5	3	3	4	3	3	4	3	4	4	3	4	4	3	4	4	3	3	3	4	3	4	3	3	3	4	4	5	4	4
228	5	5	5	4	5	5	4	4	5	4	4	5	4	4	5	5	4	5	5	5	4	5	5	4	5	5	5	5	5	5	5	4	4	4	3	4	3	4	4	5	5	5	5	4
229	5	5	4	4	5	4	4	4	5	4	5	4	5	4	5	4	4	4	4	4	3	3	3	3	4	3	3	4	3	4	4	4	4	4	3	4	3	3	3	4	5	4	5	4
230	4	5	4	4	5	5	4	5	5	5	5	5	4	5	5	4	4	4	3	3	4	4	4	3	4	5	5	4	4	4	5	4	4	5	4	5	4	4	4	4	3	4	4	4
231	3	4	4	3	4	4	4	3	3	4	4	4	4	4	4	3	4	4	4	3	3	4	3	3	3	4	4	4	3	4	4	5	5	4	4	4	4	4	5	4	4	4	4	5
232	5	5	4	5	5	4	4	4	4	4	5	5	4	4	4	4	4	4	4	4	3	4	3	4	3	4	5	4	5	5	5	4	4	4	5	4	4	4	5	3	3	3	4	4
233	3	3	3	4	3	4	4	3	4	3	3	4	3	4	4	2	2	2	3	3	2	3	2	3	3	4	4	3	3	4	4	2	2	2	3	3	3	3	3	3	4	4	4	3
234	4	4	4	3	4	4	3	4	4	4	3	4	4	4	4	3	3	4	3	4	3	4	3	4	4	4	4	4	4	4	4	3	3	3	3	3	3	3	3	3	3	3	3	3
235	4	5	4	4	5	4	5	4	4	4	4	5	5	4	4	4	4	4	4	3	4	3	4	3	3	5	5	5	4	5	4	3	3	4	3	4	3	3	3	3	3	3	3	3
236	3	3	3	4	4	4	4	4	3	4	3	4	4	3	4	4	3	4	3	4	3	4	3	4	3	4	4	3	3	4	4	4	4	4	3	4	4	4	4	3	3	3	3	3
237	2	2	2	3	3	3	3	3	3	2	2	3	3	3	2	3	3	3	4	3	3	3	4	4	3	3	3	4	4	3	3	3	3	3	3	4	4	3	4	4	3	3	4	3
238	5	5	5	4	5	4	5	5	5	4	5	4	4	4	4	3	2	2	3	3	3	4	3	4	3	4	4	3	3	4	3	2	2	2	2	2	3	3	2	3	3	3	3	3
239	3	3	3	3	3	3	3	3	3	4	4	3	3	3	4	3	2	3	2	2	2	3	3	3	2	3	3	3	3	3	3	3	3	2	2	2	3	3	3	3	3	3	3	3
240	4	4	4	3	4	4	3	3	4	4	4	4	4	4	4	4	4	4	4	3	3	4	4	3	3	4	4	4	4	4	4	4	4	4	4	5	5	5	4	4	4	3	3	3
241	4	5	5	4	5	4	5	4	5	5	5	5	5	5	4	3	4	4	3	4	4	3	3	4	4	5	4	5	5	5	5	5	5	5	4	5	5	5	5	4	4	3	3	3
242	5	5	5	4	5	4	4	5	5	4	4	4	4	5	4	4	4	4	4	3	3	4	4	3	3	3	3	4	3	3	3	3	3	3	3	4	3	3	4	3	4	3	4	4
243	4	4	4	5	4	4	5	4	5	4	5	5	4	4	4	4	4	4	3	4	4	3	3	4	4	4	4	4	4	4	4	3	3	3	3	4	3	3	4	2	3	3	2	3
244	3	4	3	4	3	3	4	3	3	4	3	4	3	4	4	3	2	2	3	3	3	3	4	3	4	4	3	3	3	3	4	3	3	3	3	2	2	2	2	2	3	2	2	2
245	5	4	5	5	5	5	4	5	4	5	5	5	4	4	4	4	4	5	4	5	5	4	4	4	5	4	4	4	4	4	4	3	3	4	4	3	4	4	3	4	3	4	4	3
246	4	4	4	3	3	3	3	3	3	4	4	4	3	3	4	2	2	3	2	2	2	2	2	2	2	3	3	2	2	3	3	3	3	2	2	2	3	3	3	4	3	4	4	3
247	3	3	3	3	3	2	3	3	3	3	3	3	3	3	2	2	2	3	3	4	3	4	4	3	4	3	3	3	3	3	3	2	2	2	2	2	2	3	2	3	3	3	4	3
248	4	4	4	4	4	3	4	4	3	4	4	4	3	3	3	3	3	2	2	4	3	4	4	4	3	3	3	3	4	4	4	2	2	3	3	2	3	3	3	3	3	2	2	3
249	4	5	4	4	5	4	5	4	4	4	5	5	5	4	4	4	4	4	4	4	5	4	4	4	4	3	3	3	4	3	3	3	3	3	3	4	3	3	3	4	4	3	3	4
250	4	4	4	3	3	4	4	3	4	4	4	3	3	3	4	4	3	3	4	4	4	4	4	5	4	4	4	4	4	4	4	3	3	3	4	4	3	3	3	3	3	3	2	3
251	3	3	3	3	3	3	3	3	3	4	3	3	4	4	4	3	3	4	3	4	4	4	4	4	4	3	3	3	3	3	3	4	4	3	4	3	4	4	3	4	3	4	3	4
252	3	3	3	4	3	3	3	4	4	4	3	3	3	3	3	4	4	4	3	4	3	4	4	3	4	3	3	3	3	3	3	2	2	2	2	2	2	2	2	3	3	3	3	3
253	3	3	3	4	4	3	4	4	4	4	4	3	3	3	4	2	2	3	3	3	3	4	3	3	4	3	3	3	3	3	3	2	2	2	3	2	3	3	3	3	3	4	3	4
254	4	4	3	4	3	4	4	4	4	3	4	3	3	3	4	3	4	4	3	4	3	3	4	3	3	3	3	4	3	4	4	4	4	3	4	3	3	3	3	4	3	4	3	3
255	4	4	4	3	4	4	3	4	3	3	4	4	3	4	4	4	3	4	4	4	3	4	4	3	3	4	3	4	4	4	4	4	4	3	3	4	4	4	4	3	3	3	3	3
256	3	3	3	4	3	3	3	3	3	4	3	4	3	4	4	3	4	4	3	3	3	4	3	4	3	4	4	3	3	4	4	3	3	4	3	4	3	3	3	5	4	5	4	4
257	4	4	4	4	5	4	5	4	4	5	5	5	5	5	4	3	4	3	4	4	4	5	5	4	4	4	5	4	5	5	5	5	5	5	5	4	4	5	4	3	4	4	4	3
258	5	5	4	5	5	5	4	4	5	4	4	4	5	5	4	5	4	4	4	4	4	3	3	3	4	4	4	4	3	4	4	3	3	4	4	3	3	3	3	4	3	3	3	3
259	4	4	4	5	4	4	5	5	4	4	5	5	5	5	4	4	4	4	3	4	3	4	3	4	4	4	3	3	3	4	4	5	5	5	5	4	5	5	5	4	3	3	4	3
260	2	3	2	3	2	3	2	3	3	2	2	3	3	3	3	3	4	4	3	4	3	4	3	3	4	2	2	2	2	3	2	2	2	2	2	2	2	2	2	3	4	4	3	4
261	5	5	4	4	4	4	4	5	5	4	5	4	5	4	5	4	4	3	4	3	3	4	3	4	4	3	4	4	3	3	4	4	3	3	4	3	3	4	4	3	4	3	3	3
262	5	5	5	5	5	4	4	5	5	4	4	5	5	5	5	4	5	4	5	4	4	3	4	3	4	4	3	4	4	3	3	2	2	3	2	3	2	3	2	4	3	3	3	3
263	4	4	5	5	5	4	5	4	5	5	4	4	5	4	5	4	5	4	4	5	4	4	4	5	4	4	4	4	4	4	5	5	5	4	5	4	5	4	4	5	5	5	5	5
264	5	5	5	4	5	5	5	5	4	5	5	4	4	4	5	3	4	4	4	4	4	3	3	4	4	4	4	4	4	4	4	2	2	3	3	3	2	3	3	3	3	3	4	4
265	5	5	5	5	4	5	5	4	4	5	4	4	4	4	5	3	4	4	4	3	4	4	3	3	4	4	4	3	4	4	3	3	3	3	2	2	2	2	2	3	3	3	4	3
266	4	5	4	5	5	4	5	4	4	4	4	4	5	4	5	4	3	3	3	4	4	3	4	3	4	4	4	4	4	4	3	3	2	2	3	2	2	3	2	4	4	3	4	3
267	3	3	3	3	4	3	3	3	3	3	4	4	3	4	3	3	4	3	4	3	4	3	4	3	4	4	3	4	4	3	3	3	3	3	2	2	2	3	3	3	2	3	3	3
268	5	5	4	5	5	4	5	5	5	4	5	4	5	4	5	4	5	4	4	4	4	4	3	4	4	3	3	4	4	3	4	3	2	2	3	3	3	2	2	3	4	3	4	4
269	5	5	4	4	4	4	5	4	4	5	4	4	4	4	4	3	4	4	4	4	4	4	4	4	4	4	4	4	4	4	4	3	3	3	3	4	4	3	4	4	3	3	4	3
270	3	3	3	4	3	3	3	3	3	3	4	3	3	4	4	3	4	3	3	3	3	3	3	3	3	3	3	3	3	3	4	3	4	3	3	3	4	4	3	3	2	3	3	3
271	3	3	3	3	3	3	3	3	3	3	3	4	3	3	3	4	3	3	3	3	4	4	3	3	3	3	3	3	3	3	3	2	2	2	2	3	3	2	2	4	4	3	4	3
272	3	4	3	4	3	3	3	3	3	3	3	3	4	3	3	4	4	3	3	4	4	4	3	4	4	3	3	4	3	3	4	2	2	2	3	2	2	2	2	3	3	4	3	4
273	3	3	4	4	3	3	4	4	4	4	3	3	4	3	4	4	4	4	3	3	4	3	4	3	4	4	4	4	4	4	4	2	3	3	3	3	3	2	2	3	4	4	3	3
274	3	3	4	4	3	4	4	4	3	3	3	3	3	4	4	3	3	3	3	3	3	3	3	4	3	2	3	3	2	3	3	3	2	2	2	2	2	3	3	4	3	3	3	3
275	3	3	3	3	3	3	3	3	3	3	3	4	4	3	3	3	4	4	3	3	3	4	3	3	4	3	4	4	3	4	4	2	2	2	3	3	2	2	2	3	3	4	3	3
276	3	4	3	3	3	4	4	3	3	3	4	3	3	3	3	4	4	4	3	4	4	3	3	3	3	3	4	4	3	3	3	3	3	3	3	4	3	4	4	3	4	4	4	4
277	5	5	5	5	4	5	5	5	5	5	5	5	5	4	5	4	4	4	5	4	4	3	4	4	3	3	4	3	3	4	3	4	4	4	3	3	3	3	3	3	2	2	3	2
278	3	4	3	3	3	3	3	3	3	3	3	3	3	3	4	4	4	4	3	4	4	3	4	4	3	2	2	3	2	2	3	2	3	2	2	2	2	2	2	4	3	4	4	3
279	2	3	2	2	2	2	2	2	2	2	3	2	2	2	2	3	3	4	4	3	2	2	3	2	2	3	3	2	2	3	2	2	2	1	1	2	2	1	2	2	3	3	2	2
280	3	4	3	3	3	3	3	3	3	3	3	3	3	4	4	4	4	4	3	4	4	3	3	4	3	3	3	3	3	3	3	3	3	3	3	4	3	3	3	3	4	3	4	4
281	3	3	3	3	3	4	3	3	3	3	3	3	3	3	3	3	4	3	3	4	3	3	3	4	3	3	4	3	3	4	3	2	3	2	2	2	3	2	2	3	3	3	2	3
282	4	3	4	4	3	4	4	4	4	4	4	4	4	3	4	3	3	3	4	3	3	3	2	3	3	3	4	3	4	3	3	4	4	3	3	4	4	3	3	3	4	4	4	3
283	3	4	3	3	3	4	4	3	4	4	4	3	3	3	3	4	3	4	3	4	4	3	3	3	3	4	3	3	4	4	3	3	3	2	2	2	3	3	2	3	3	3	3	3
284	4	3	3	3	3	4	4	4	3	3	3	3	3	4	4	4	4	4	3	4	3	4	4	4	3	4	4	4	4	4	3	2	3	3	3	2	2	3	3	4	3	4	4	4
285	3	3	4	3	3	3	3	3	4	4	4	3	3	4	3	3	4	4	3	4	4	4	4	3	3	4	3	3	4	4	3	3	3	3	4	4	4	4	3	3	4	3	3	4
286	4	3	3	3	3	3	3	3	4	4	4	3	3	3	4	4	4	4	3	4	4	4	4	3	3	3	2	3	3	2	3	2	3	3	2	3	3	3	3	3	3	3	4	4
287	3	3	3	3	4	3	3	3	3	3	4	4	3	4	4	5	5	4	5	3	4	4	3	4	3	3	4	4	3	3	4	3	2	2	2	3	3	3	3	3	4	4	4	3
288	3	3	4	3	3	3	3	3	3	3	3	3	4	3	3	3	3	3	3	3	3	4	4	4	4	3	3	4	3	3	4	3	3	3	2	2	2	3	3	3	3	4	4	3
289	3	4	4	4	3	4	4	4	4	4	4	3	3	4	3	3	2	3	3	2	3	2	2	3	3	2	2	3	2	2	3	3	3	3	3	2	3	3	2	4	3	4	3	3
290	3	3	4	4	4	4	4	4	4	4	4	3	4	4	4	3	3	3	2	3	3	4	3	3	4	3	4	4	3	3	4	3	4	4	3	3	3	4	3	3	3	3	3	2
291	5	4	4	5	4	5	5	5	4	4	5	5	5	4	4	3	3	3	3	3	3	4	4	3	4	4	4	4	4	3	4	3	3	3	3	3	3	3	2	3	4	3	3	3
292	4	4	4	4	3	3	4	4	4	4	3	3	3	4	3	3	3	3	3	3	3	3	2	3	3	2	2	3	2	3	2	3	2	3	2	3	3	3	3	3	3	3	3	4
293	3	4	3	3	3	3	3	4	3	3	3	3	3	3	4	3	3	3	3	3	3	4	4	3	3	3	3	3	3	3	3	3	3	3	4	3	3	4	3	3	4	4	4	3
294	3	3	4	4	3	3	4	3	3	3	4	3	4	4	4	3	3	3	3	3	3	4	4	3	3	4	3	3	4	4	4	4	4	4	3	4	4	4	3	3	2	2	3	3
295	4	4	4	4	4	4	4	4	3	3	3	4	3	3	3	3	3	3	4	3	4	3	3	4	3	2	3	3	2	2	3	3	3	3	2	3	3	3	3	4	3	3	3	4
296	3	4	3	4	3	3	3	3	3	3	4	3	4	3	4	2	3	3	3	3	3	3	3	2	3	3	3	3	3	3	3	3	2	3	3	2	3	3	2	3	4	3	3	3
297	3	3	3	4	3	3	3	4	4	4	4	3	3	3	3	3	3	3	3	3	3	3	3	2	3	4	3	3	4	3	3	4	3	4	4	3	4	3	3	4	3	4	3	3
298	3	3	4	4	3	4	4	3	3	3	3	3	4	3	4	3	3	3	3	3	3	3	3	2	2	3	3	2	3	2	3	3	2	3	2	3	3	2	3	4	4	3	3	4
